# Supplementary material
Source: PubMed Central journal article supplement (PMC7960367)
Supplement: 16-00682.pdf [file 16-00682.pdf]

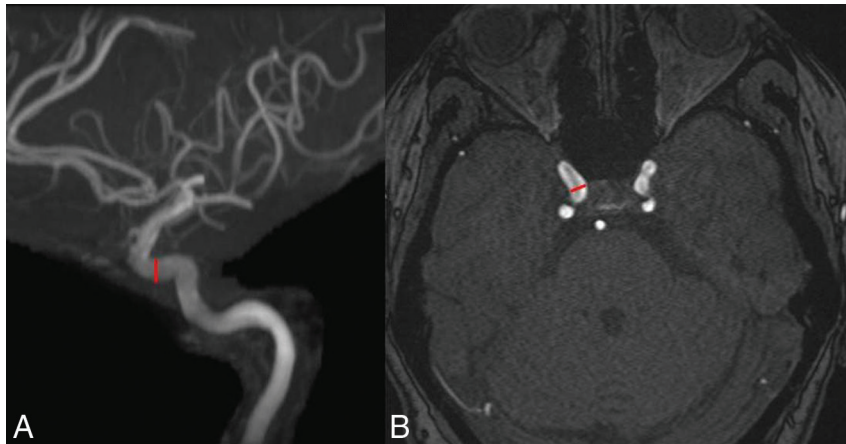

**ON-LINE FIG 1.** In this patient without any intracranial ICA stenosis, a linear measurement is made in the normal-caliber, nonstenotic cavernous ICA on both MIP (A) and axial source (B) images.

**On-line Table. Statistical measurements of performance for using linear measurement cutoffs to predict 50% and 70% stenosis (Fig 3)**

| Measure     | Value | >50% Stenosis |          | Value | >70% Stenosis |          |
|-------------|-------|---------------|----------|-------|---------------|----------|
|             |       | Lower CI      | Upper CI |       | Lower CI      | Upper CI |
| Sensitivity | 89.9  | 83.6          | 96.2     | 100.0 | 100.0         | 100.0    |
| Specificity | 86.0  | 76.4          | 95.6     | 95.5  | 92.0          | 99.0     |
| PPV         | 92.0  | 86.2          | 97.7     | 50.0  | 21.7          | 78.3     |
| NPV         | 82.7  | 72.4          | 93.0     | 100.0 | 100.0         | 100.0    |

**Note:**—PPV indicates positive predictive value; NPV, negative predictive value.
